# Supplementary material for: Melatonin improves stroke through MDM2-mediated ubiquitination of ACSL4
Source: publisher site journal article supplement (doi:10.18632/aging.205469), 2024-01-29
Supplement: Supplementary file [file aging-v16i2-205469-supplementary-material-SD1.pdf]

## SUPPLEMENTARY TABLE

**Supplementary Table 1. The primer sequences of qRT-PCR.**

| <b>Gene symbol</b> | <b>Forward sequence (5'–3')</b> | <b>Reverse sequence (5'–3')</b> |
|--------------------|---------------------------------|---------------------------------|
| ACSL4              | ACTGGCGATATTGGAGAAT             | CACATAGGACTGGTCACTT             |
| MDM2               | GGCGAGCTTGGCTGCTTC              | TGAGTCCGATGATTCCTGCTG           |
| $\beta$ -actin     | AGATCAAGATCATTGCTCCTCCT         | ACGCAGCTCAGTAACAGTCC            |
